# Supplementary material for: Introgression among three rockfish species (Sebastes spp.) in the Salish Sea, northeast Pacific Ocean
Source: PubMed Central journal article supplement (PMC5864001; doi:10.1371/journal.pone.0194068), 2018-03-22
Supplement: pone.0194068.s003.pdf [file pone.0194068.s003.pdf]

**S3 Table. Individual samples with a discordant haplotype** (gray highlight) or individuals whose haplotypes are ‘shared’ haplotypes with another morphological species. The columns for each locus see Cytb (S2 File,Figure A); Ets (S2 File,Figure B); S7 in (S2 File,Figure C); Mep (S2 File,Figure D); Mdh (S2 File,Figure E). The Fish Identifier column abbreviates species and population as follows: Sa – *S. auriculatus*, Sc – *S. caurinus*, Sm – *S. maliger*, Co – coast, and SS –Salish Sea. The number in each column is the haplotype identifier for that locus and that individual. The ‘u’ designates where the haplotype is unique otherwise they were all ‘shared’. The nuclear loci show both haplotypes with a ‘/’ separator if the second haplotype conforms to morphological species then ‘/ – .’

| Fish Identifier | Region | CYTB              | ETS | S7                | MEP     | MDH  |
|-----------------|--------|-------------------|-----|-------------------|---------|------|
| SaSS008         | SPS    | 23 u <sup>M</sup> |     |                   |         |      |
| SaSS011         | CPS    |                   |     |                   | 23 u/ – |      |
| SaSS012         | CPS    |                   |     | 5/ – <sup>M</sup> |         |      |
| SaSS023         | CPS    |                   |     |                   | 5/9     | 2/2  |
| SaSS025         | HC     |                   |     | 5/6 <sup>M</sup>  |         |      |
| SaSS006         | SPS    |                   |     |                   | 23 u/ – |      |
| SaSS004         | SPS    | 20 <sup>M</sup>   |     |                   | 9/ –    |      |
| SaSS017         | SPS    |                   |     |                   | 23 u/ – |      |
| ScSS051         | CPS    |                   |     | 4/ – <sup>M</sup> |         |      |
| ScSS053         | CPS    |                   |     | 5/ – <sup>M</sup> |         |      |
| ScSS054         | CPS    |                   |     |                   |         | 1/ – |
| ScSS055         | CPS    |                   | 8/8 | 3/ – <sup>A</sup> |         |      |
| ScSS056         | CPS    | 18 <sup>M</sup>   |     | 3/ – <sup>A</sup> |         |      |
| ScSS063         | HC     |                   | 8/8 |                   |         |      |
| ScSS065         | HC     | 18 <sup>M</sup>   |     |                   |         |      |
| ScSS069         | HC     | 18 <sup>M</sup>   |     |                   |         |      |
| ScSS071         | HC     | 18 <sup>M</sup>   |     | 5/ –              |         |      |
| ScSS073         | HC     |                   |     | 5/ –              |         | 1/ – |
| ScSS074         | HC     |                   |     |                   |         | 1/ – |
| <b>ScSS045</b>  | SPS    | 18 <sup>M</sup>   |     | 5/ –              |         | 1/ – |
| ScSS046         | SPS    |                   |     | 5/ –              |         |      |
| ScSS048         | SPS    | 18 <sup>M</sup>   |     |                   |         | 1/ – |
| ScSS087         | NPS    |                   |     |                   |         | 3/ – |
| ScSS002         | WB     | 18 <sup>M</sup>   |     |                   |         |      |
| ScSS033         | WB     | 18 <sup>M</sup>   |     |                   |         |      |
| ScSS035         | WB     | 18 <sup>M</sup>   |     |                   |         | 1/ – |
| ScSS039         | WB     |                   |     |                   |         | 1/ – |
| ScSS040         | WB     |                   |     |                   |         | 1/ – |
| SmSS181         | SPS    | 12 <sup>C</sup>   |     |                   |         |      |
| SmSS161         | WB     | 22 <sup>A</sup>   |     |                   |         |      |
| SmSS164         | WB     | 22 <sup>A</sup>   |     |                   |         |      |
| SmSS173         | WB     |                   | 3/3 |                   |         |      |
| SmCo019         | Coast  |                   | 3/3 |                   |         | 2/2  |
| SmCo022         | Coast  |                   |     | 10/ –             |         | 2/2  |

<sup>M</sup> haplotype is most common in *S. maliger* morphological species, <sup>A</sup> haplotype is most common in *S. auriculatus* morphological species, <sup>C</sup> haplotype is most common in *S. caurinus* morphological specie
